# Supplementary material for: Sustainable rose multiflora derived nitrogen/oxygen-enriched micro-/mesoporous carbon as a low-cost competitive electrode towards high-performance electrochemical supercapacitors
Source: Royal Society of Chemistry journal article supplement (doi:10.1039/c8ra00858b), 2018-01-01
Supplement: c8ra00858b1.pdf [file c8ra00858b1.pdf]

## Supporting Information

**Sustainable rose multiflora derived nitrogen/oxygen-enriched micro-  
/mesoporous carbon as low-cost competitive electrode towards high-performance  
electrochemical supercapacitors**

*Qiuli Chen*<sup>a, †</sup>, *Jinfeng Sun*<sup>b, †</sup>, *Zhengluo Wang*<sup>a</sup>, *Zhiwei Zhao*<sup>a</sup>, *Yanru Zhang*<sup>a</sup>, *Yang*

*Liu*<sup>b</sup>, *Linrui Hou*<sup>b, \*</sup>, *Changzhou Yuan*<sup>b, \*</sup>

<sup>a</sup> *School of Materials Science & Engineering, Anhui University of Technology,  
Ma'anshan, 243002, P. R. China*

<sup>b</sup> *School of Materials Science & Engineering, University of Jinan, Jinan, 250022, P. R.  
China*

\*Corresponding authors

Tel/Fax: +86-531-82769410

Email: mse\_houlr@ujn.edu.cn (*Prof. L. R. Hou*)

mse\_yuancz@ujn.edu.cn; ayuancz@163.com (*Prof. C. Z. Yuan*)

† These authors contributed equally to this work

## Supporting Information

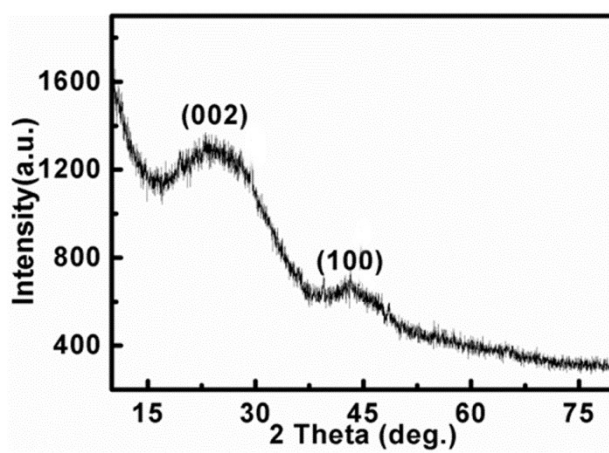

**Fig. S1.** Typical XRD pattern of the NOC-K product

## Supporting Information

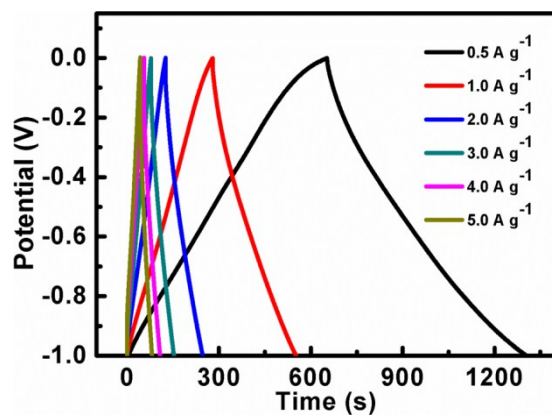

**Fig. S2.** CP plots of the NOC-K in 6 M KOH aqueous electrolyte

## Supporting Information

**Table S1** Comparisons between the NOC-K electrode and other carbon electrodes in electrochemical performance in various electrolytes and different testing systems as indicated

| Carbons                                       | SC<br>(F g <sup>-1</sup> ) | Current<br>density       | Mass loading               | SED<br>(Wh kg <sup>-1</sup> ) | SPD<br>(W kg <sup>-1</sup> ) | Ref.        |
|-----------------------------------------------|----------------------------|--------------------------|----------------------------|-------------------------------|------------------------------|-------------|
| Newspaper-based C                             | ~180 <sup>a</sup>          | 2 mV s <sup>-1 a</sup>   | 10 mg <sup>a</sup>         | /                             | /                            | 1           |
| Coconut-shell based C                         | ~228 <sup>a</sup>          | 5 mV s <sup>-1 a</sup>   | ~5 mg cm <sup>-2 a</sup>   | /                             | /                            | 2           |
|                                               | ~48 <sup>b</sup>           | 1 A g <sup>-1 b</sup>    | /                          | ~9.6 <sup>b</sup>             | /                            |             |
| Prawn shells-based C                          | ~315 <sup>a</sup>          | 0.2 A g <sup>-1 a</sup>  | ~3.5 mg <sup>a</sup>       | /                             | /                            | 3           |
|                                               | /                          | 0.05 A g <sup>-1 b</sup> | ~7.0 mg <sup>b</sup>       | ~7.8 <sup>b</sup>             | /                            |             |
| Pomelo peel-based C                           | ~342 <sup>a</sup>          | 0.1 A g <sup>-1 a</sup>  | 2 mg <sup>a</sup>          | /                             | /                            | 4           |
|                                               | ~68 <sup>b</sup>           | 0.2 A g <sup>-1 b</sup>  | 4 mg <sup>b</sup>          | ~9.4 <sup>b</sup>             | 96 <sup>b</sup>              |             |
| Chestnut shell-based C                        | ~59.6 <sup>b</sup>         | 0.1 A g <sup>-1 b</sup>  | 4.0 mg <sup>b</sup>        | ~6.7 <sup>b</sup>             | 9000 <sup>b</sup>            | 5           |
| Bamboo-based C                                | ~301 <sup>a</sup>          | 0.1 A g <sup>-1 a</sup>  | 2 mg cm <sup>-2 a</sup>    | /                             | /                            | 6           |
| Cotton-based C                                | ~314 <sup>a</sup>          | 0.1 A g <sup>-1 a</sup>  | 10 mg <sup>a</sup>         | /                             | /                            | 7           |
| Lotus seedpod shell-based C                   | ~165 <sup>a</sup>          | 0.5 A g <sup>-1 a</sup>  | 8 mg <sup>a</sup>          | /                             | /                            | 8           |
| Corn stover-based C                           | ~211.6 <sup>a</sup>        | 1 A g <sup>-1 a</sup>    | /                          | /                             | /                            | 9           |
| Endothelium corneum<br>Gigeriae galli-based C | ~198 <sup>a</sup>          | 1 A g <sup>-1 a</sup>    | /                          | /                             | /                            | 10          |
| coffee grounds-based C                        | ~175 <sup>a</sup>          | 1 A g <sup>-1 a</sup>    | 2 mg cm <sup>-2 a</sup>    | /                             | /                            | 11          |
| Lignin-based C                                | ~286.7 <sup>b</sup>        | 0.2 A g <sup>-1 b</sup>  | /                          | ~8.9 <sup>b</sup>             | 51.92 <sup>b</sup>           | 12          |
| Loofah sponge network-based C                 | ~304 <sup>a</sup>          | 1 A g <sup>-1 a</sup>    | ~4 mg <sup>a</sup>         | /                             | /                            | 13          |
|                                               | ~51.5 <sup>c</sup>         | 1 A g <sup>-1 c</sup>    | /                          | ~10 <sup>c</sup>              | ~500 <sup>c</sup>            |             |
| Biowaste corncob C                            | ~298.0 <sup>a</sup>        | 10 mV s <sup>-1 a</sup>  | ~4.5 mg cm <sup>-2 a</sup> | /                             | /                            | 14          |
|                                               | ~30.0 <sup>b</sup>         | 1 A g <sup>-1 b</sup>    | ~4.5 mg cm <sup>-2 b</sup> | ~5.3 <sup>b</sup>             | ~8276 <sup>b</sup>           |             |
|                                               | /                          | /                        | /                          | ~15 <sup>d</sup>              | ~2827 <sup>d</sup>           |             |
| Cashmere-C                                    | ~236.0 <sup>a</sup>        | 1 A g <sup>-1 a</sup>    | 3 mg <sup>a</sup>          | /                             | /                            | 15          |
|                                               | ~32.0 <sup>b</sup>         | 1 A g <sup>-1 b</sup>    | 6 mg <sup>b</sup>          | ~3.4 <sup>b</sup>             | /                            |             |
|                                               | ~18.0 <sup>e</sup>         | 1 A g <sup>-1 e</sup>    | 2.4 mg <sup>e</sup>        | ~17.9 <sup>e</sup>            | ~125 <sup>e</sup>            |             |
| Nitrogen-rich carbon<br>sphere                | ~371 <sup>a</sup>          | 0.5 A g <sup>-1 a</sup>  | 1 mg <sup>a</sup>          | /                             | /                            | 16          |
|                                               | /                          | /                        | 2 mg <sup>b</sup>          | ~9.97 <sup>b</sup>            | ~125 <sup>b</sup>            |             |
|                                               | ~81 <sup>e</sup>           | 0.5 A g <sup>-1 e</sup>  | /                          | ~50.6 <sup>e</sup>            | ~400 <sup>e</sup>            |             |
| Shiitake mushroom C                           | ~306 <sup>a</sup>          | 1 A g <sup>-1 a</sup>    | 2.4 mg <sup>a</sup>        | /                             | /                            | 17          |
|                                               | /                          | /                        | /                          | ~8.2 <sup>b</sup>             | ~100 <sup>b</sup>            |             |
|                                               | /                          | /                        | /                          | ~31.7 <sup>d</sup>            | ~6250 <sup>d</sup>           |             |
| Carbon nanosheets                             | ~25.8 <sup>d</sup>         | 5 A g <sup>-1 d</sup>    | 3.5 mg <sup>d</sup>        | ~22.4 <sup>d</sup>            | /                            | 18          |
| N-doped graphene-C                            | ~58 <sup>e</sup>           | 1 A g <sup>-1 e</sup>    | /                          | ~30.4 <sup>e</sup>            | ~1000 <sup>e</sup>           | 19          |
| Porous carbon                                 | ~54 <sup>d</sup>           | 1 A g <sup>-1 d</sup>    | 0.8 mg cm <sup>-2 d</sup>  | ~20 <sup>d</sup>              | ~500 <sup>d</sup>            | 20          |
| NOC-K                                         | ~281.6 <sup>a</sup>        | 1 A g <sup>-1 a</sup>    | 5 <sup>a</sup>             | /                             | /                            | Our<br>work |
|                                               | ~56.8 <sup>b</sup>         | 1 A g <sup>-1 b</sup>    | 6 <sup>b</sup>             | ~7.9 <sup>b</sup>             | ~500 <sup>b</sup>            |             |
|                                               | ~35.7 <sup>e</sup>         | 10 A g <sup>-1 e</sup>   | 0.43 <sup>e</sup>          | ~38.9 <sup>e</sup>            | ~14000 <sup>e</sup>          |             |

## Supporting Information

**Notes:** *a* for 6M KOH (3-electrode system); *b* for 6M KOH (2-electrode symmetric cell); *c* for 1 M Et<sub>4</sub>NBF<sub>4</sub>-PC (2-electrode symmetric cell); *d* for 1 M TEABF<sub>4</sub>-AN (2-electrode symmetric cell); *e* for 1M TEABF<sub>4</sub>/PC (2-electrode symmetric cell)

### References:

- [1] D. Kalpana, S. H. Cho, S. B. Lee, Y. S. Lee, R. Misra, N. G. Renganathan, Recycled waste paper-A new source of raw material for electric double-layer capacitors, *J. Power Sources* 190 (2009) 587-591.
- [2] J. Mi, X. R. Wang, R. J. Fan, W. H. Qu, W. C. Li, Coconut-shell-based porous carbons with a tunable micro/mesopore ratio for high-performance supercapacitors, *Energy Fuels* 26 (2012) 5321.
- [3] F. Gao, J. Y. Qu, Z. B. Zhao, Z. Y. Wang, J. S. Qiu, Nitrogen-doped activated carbon derived from prawn shells for high-performance supercapacitors, *Electrochim. Acta* 190 (2016) 1134.
- [4] Q. H. Liang, L. Ye, Z. H. Huang, Q. Xu, Y. Bai, F. Y. Kang, Q. H. Yang, A honeycomb-like porous carbon derived from pomelo peel for use in high-performance supercapacitors, *Nanoscale* 6 (2014) 13831.
- [5] M. Jiang, J. Q. Zhang, L. B. Xing, J. Zhou, H. Y. Cui, W. J. Si, S. P. Zhuo, KOH-activated porous carbons derived from chestnut shell with superior capacitive performance, *Chin. J. Chem.* 34 (2016) 1093.
- [6] W. Q. Tian, Q. M. Gao, Y. L. Tian, K. Yang, L. H. Zhu, C. X. Yang, Z. Hang, Bio-inspired beehive-like hierarchical nanoporous carbon derived from bamboo-based industrial byproduct as a high performance supercapacitor electrode material, *J Mater. Chem. A* 3 (2015) 5656.
- [7] K. Song, W. L. Song, L. Z. Fan, Scalable fabrication of exceptional 3D carbon networks for supercapacitors, *J. Mater. Chem. A* 3 (2015) 16104.
- [8] X. Wang, M. J. Wang, X. M. Zhang, H. J. Li, X. H. Guo, Low-cost, green synthesis of highly porous carbons derived from lotus root shell as superior performance electrode materials in supercapacitor, *J. Energy Chem.* 25 (2016) 26.
- [9] H. Jin, X. M. Wang, Y. B. Shen, Z. R. Gu, A high-performance carbon derived

## Supporting Information

from corn stover via microwave and slow pyrolysis for supercapacitors, *J. Anal. Appl. Pyrolysis* 110 (2014) 18.

[10] X. T. Hong, K. S. Hui, Z. Zeng, K. N. Hui, L. J. Zhang, M. Y. Mo, M. Li, Hierarchical nitrogen-doped porous carbon with high surface area derived from endothelium corneum gigeriae galli for high-performance supercapacitor, *Electrochim. Acta* 130 (2014) 464.

[11] C. H. Wang, W. C. Wen, H. C. Hsu, B. Y. Yao, High-capacitance KOH-activated nitrogen-containing porous carbon material from waste coffee grounds in supercapacitor, *Adv. Powder Technol.* 27 (2016) 1387.

[12] W. L. Zhang, M. Z. Zhao, R. Y. Liu, X. F. Wang, H. B. Lin, Hierarchical porous carbon derived from lignin for high performance supercapacitor, *Colloid Surfaces A* 484 (2015) 518.

[13] Y. T. Luan, L. Wang, S. Guo, B. J. Jiang, D. D. Zhao, H. J. Yan, C. G. Tian, H. G. Fu, A hierarchical porous carbon material from a loofah sponge network for high performance supercapacitors, *RSC Adv.* 5 (2015) 42430.

[14] W. H. Qu, Y. Y. Xu, A. H. Lu, X. Q. Zhang, W. C. Li, Converting biowaste corn cob residue into high value added porous carbon for supercapacitor electrodes, *Bioresour. Technol.* 287 (2005) 428.

[15] L. Zhou, H. Cao, S. Q. Zhu, L. R. Hou, C. Z. Yuan, Hierarchical micro-/mesoporous N- and O-enriched carbon derived from disposable cashmere: a competitive cost-effective material for high-performance electrochemical capacitors, *Green Chem.* 17 (2015) 2373.

[16] F. Sun, H. B. Wu, X. Liu, F. Liu, H. H. Zhou, J. H. Gao, Y. F. Lu, Nitrogen-rich carbon sphere made by a continuous spraying process for high-performance supercapacitors, *Nano Res.* 9 (2016) 3209.

[17] P. Cheng, S. Y. Gao, P. Y. Zang, X. F. Yang, Y. L. Bai, H. Xu, Z. H. Liu, Z. B. Lei., Hierarchically porous carbon by activation of shiitake mushroom for capacitive energy storage, *Carbon* 93 (2015) 315.

## Supporting Information

- [18] G. P. Hao, A. H. Lu, W. Dong, Z. Y. Jin, X. Q. Zhang, J. T. Zhang, W. C. Li, Sandwich-type microporous carbon nanosheets for enhanced supercapacitor performance, *Adv. Energy Mater.* 3 (2013) 1421.
- [19] S. M. Li, S. Y. Yang, Y. S. Wang, H. P. Tsai, H. W. Tien, S. T. Hsiao, W. H. Liao, C. L. Chang, C. C. M. Ma, C. C. Hu, N-doped structure and surface functional groups of reduced graphene oxide and their effect on the electrochemical performance of supercapacitor with organic electrolyte, *J. Power Sources* 278 (2015) 218.
- [20] E. Frackowiak, G. Lota, J. Machnikowski, C. Vix-Guterl, F. Béguin, Optimisation of supercapacitors using carbons with controlled nanotexture and nitrogen content, *Electrochim. Acta* 51 (2006) 2209.

# Supporting Information

**Table S2**

The parameter value of fitting EIS

| Samples | $R_s$ (Ohm) | $R_{ct}$ (Ohm) |
|---------|-------------|----------------|
| NOC     | ~0.6        | ~6.4           |
| NOC-K   | ~0.4        | ~1.6           |



## Supporting Information

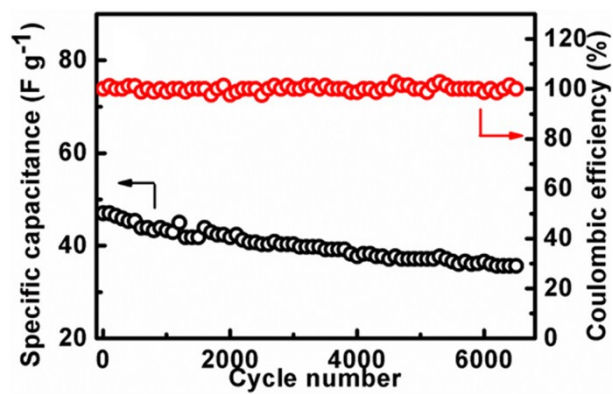

**Fig. S4.** Cycling performance of the NOC-K based symmetric device with 1 M TEABF<sub>4</sub>/PC organic electrolyte in the voltage range from 0.0 to 3.0 V

## Supporting Information

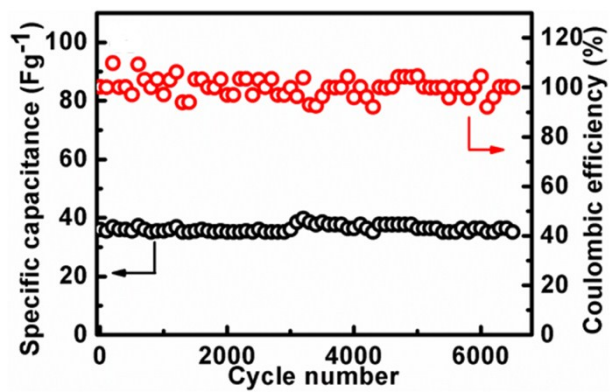

**Fig. S5.** Cycling performance of the NOC-K based symmetric device with 1 M TEABF<sub>4</sub>/PC organic electrolyte in the voltage range from 0.0 to 2.5 V
